# Supplementary material
Source: ML conference proceedings conference paper supplement (https://openreview.net/forum?id=YlleMywQzX)

## EA Search

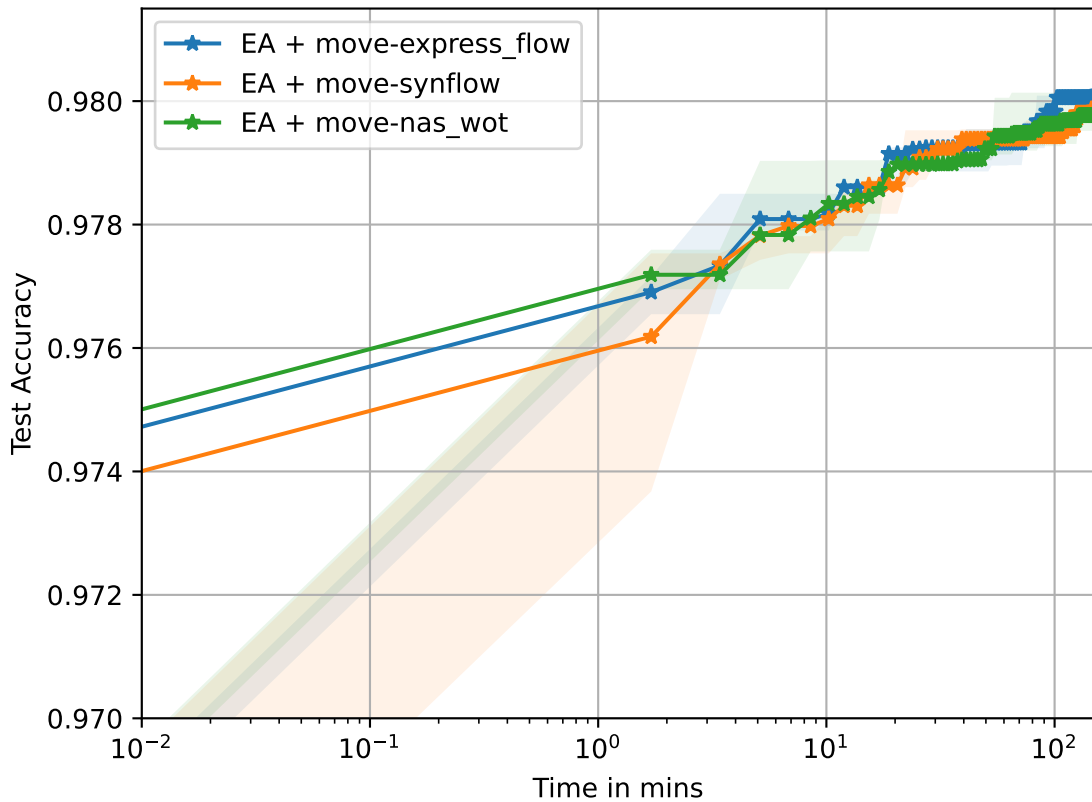

Supplement: supplementary_material [file attachment]

AUC on DIABETES

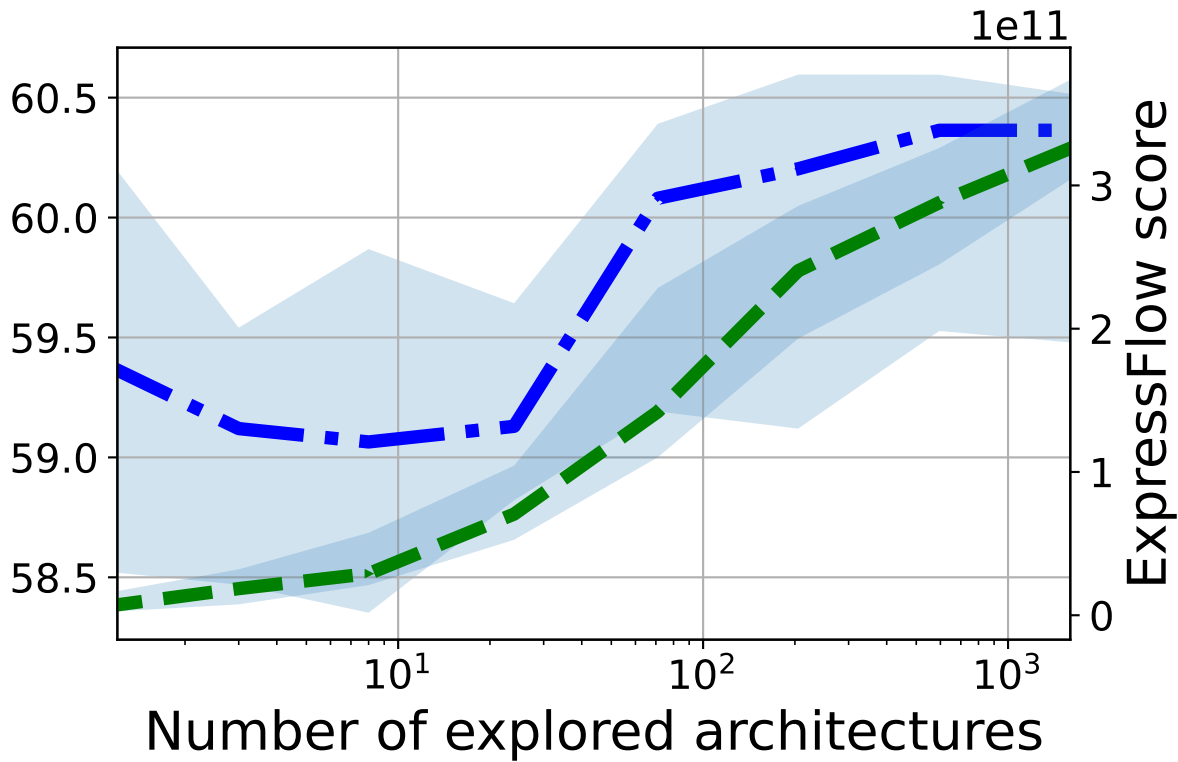

Supplement: supplementary_material [file attachment]

AUC on CRITEO

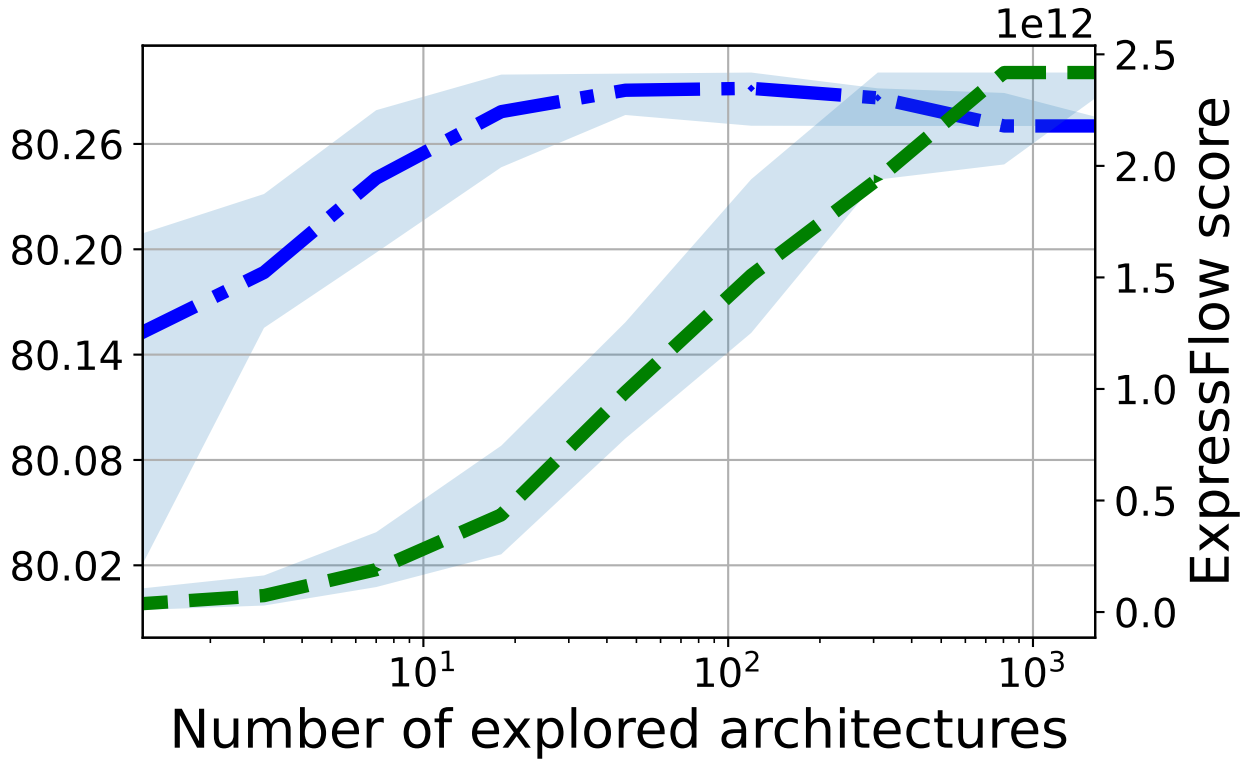

Supplement: supplementary_material [file attachment]

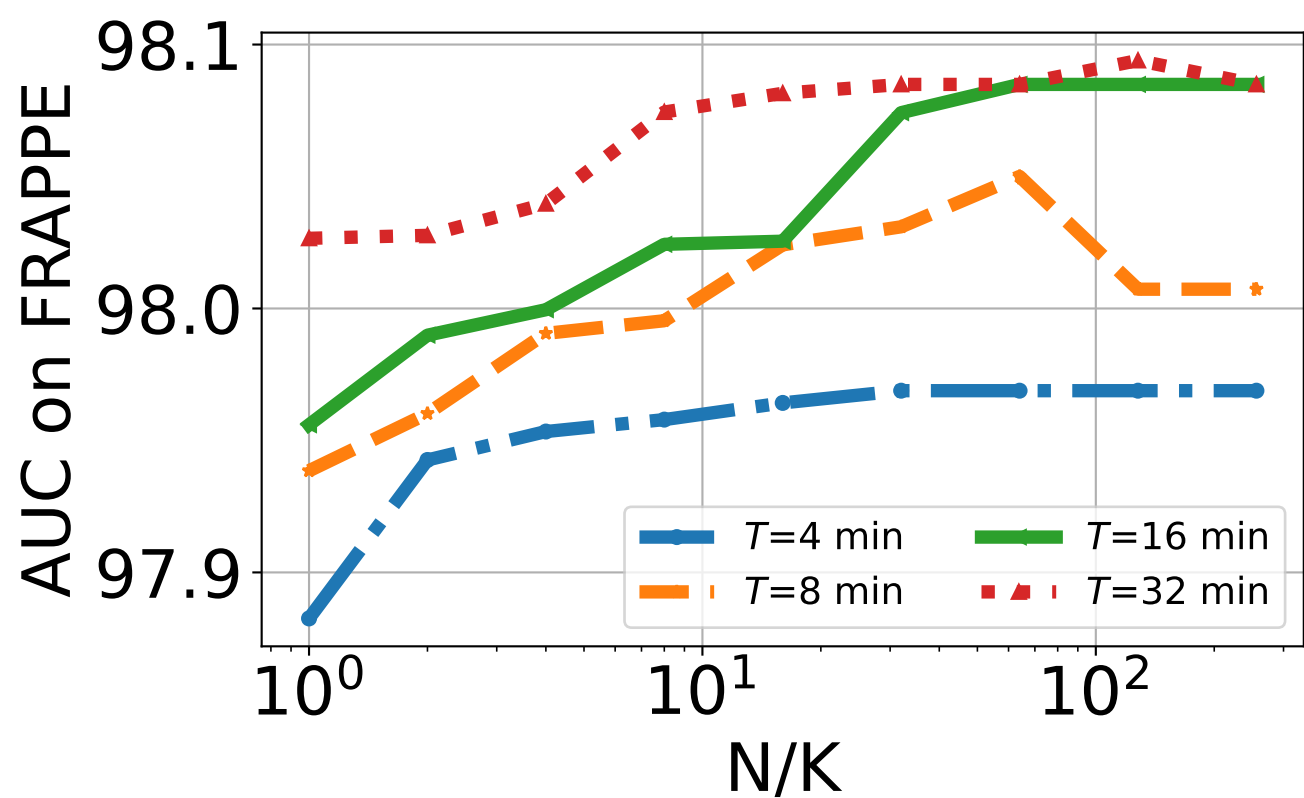

Supplement: supplementary_material [file attachment]

AUC on FRAPPE

98.0

97.9

97.8

97.7

97.6

97.5

$10^{-2}$

$10^{-1}$

$10^0$

$10^1$

$10^2$

Response Time Threshold  $T_{max}$  (min)

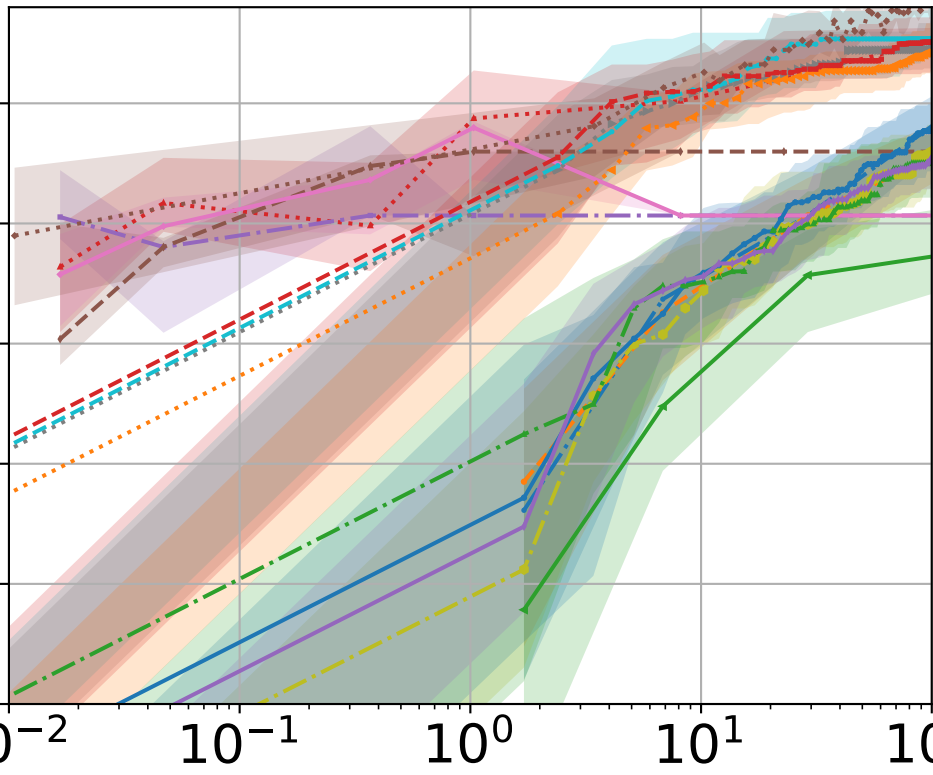

Supplement: supplementary_material [file attachment]

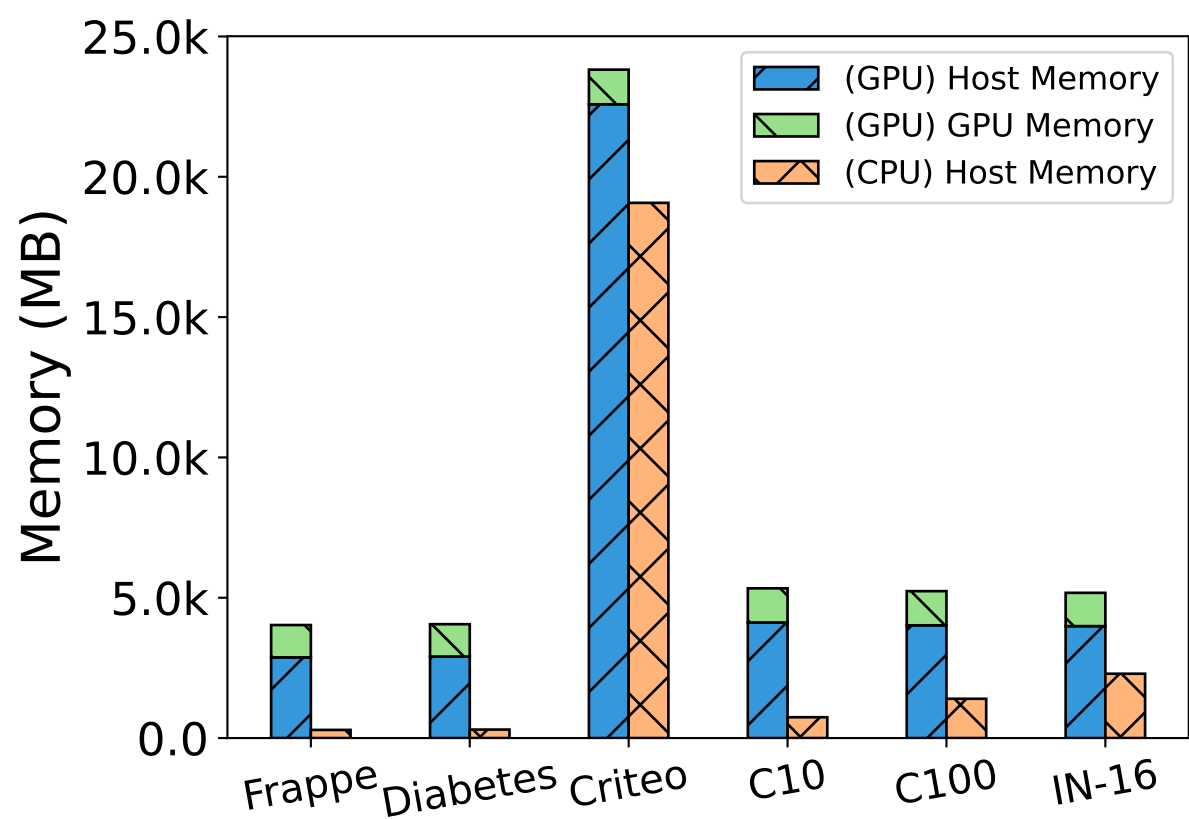

Supplement: supplementary_material [file attachment]

AUC on DIABETES

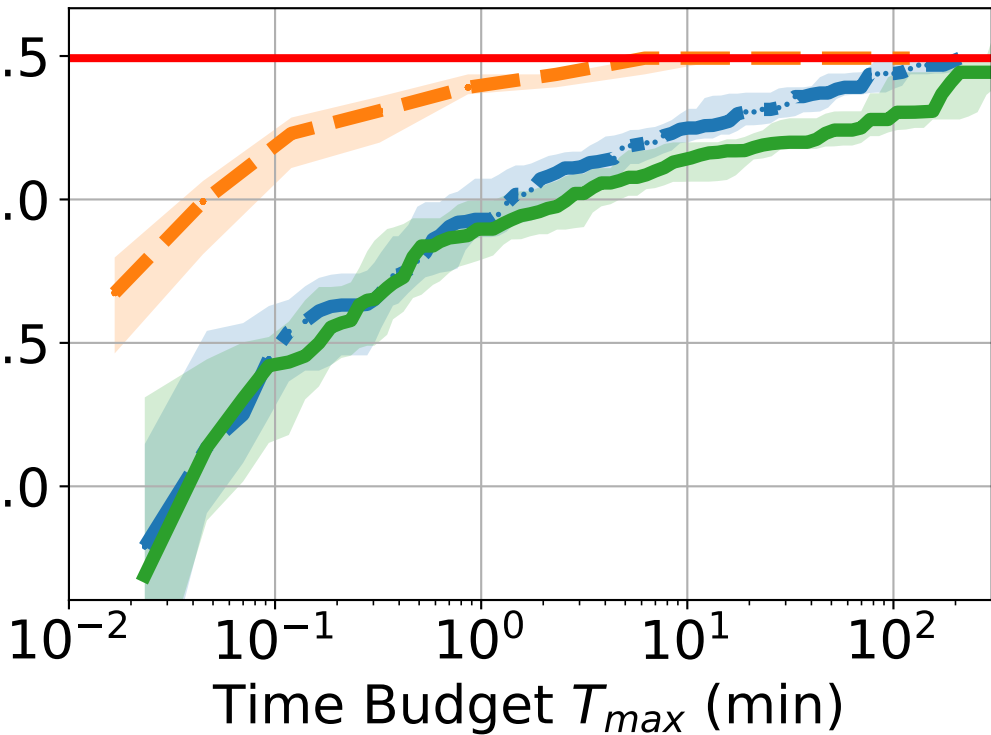

Supplement: supplementary_material [file attachment]

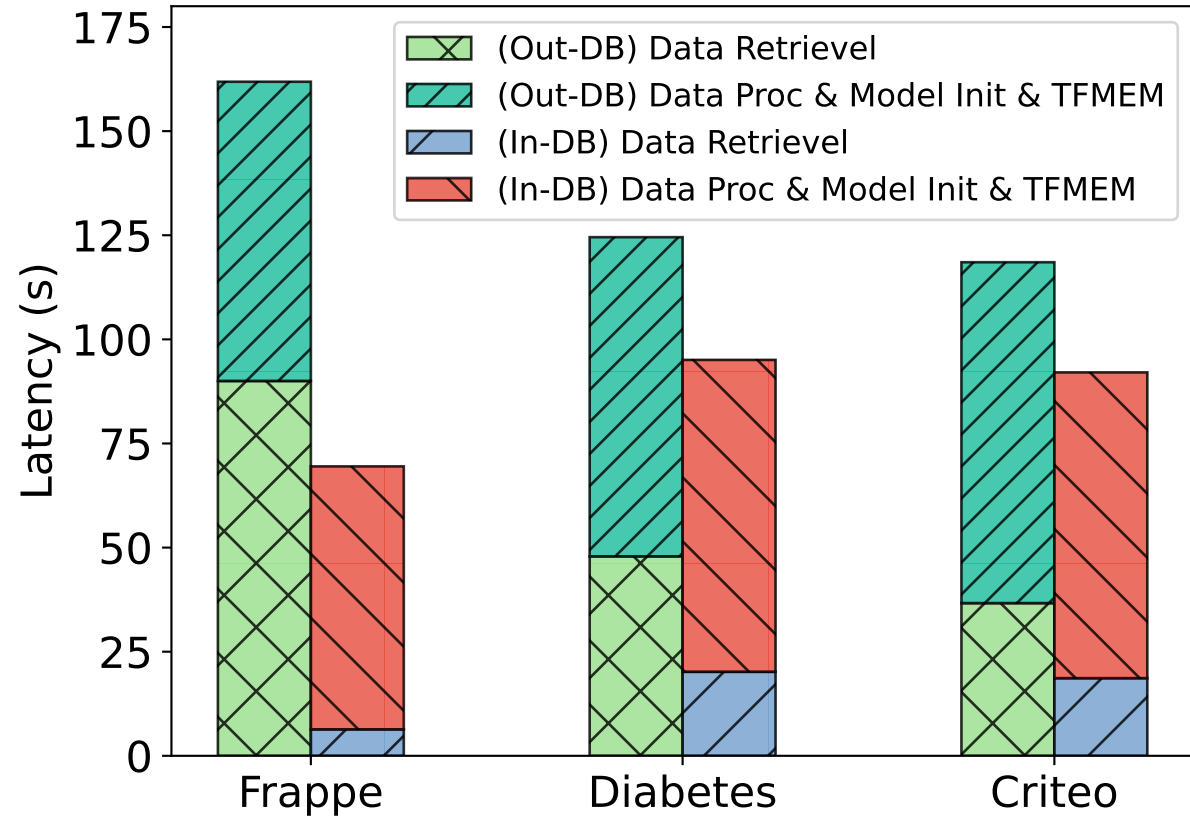

Supplement: supplementary_material [file attachment]

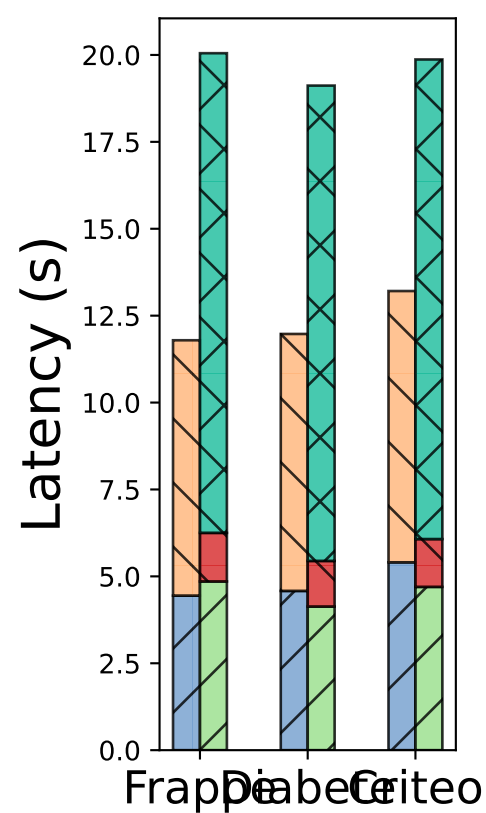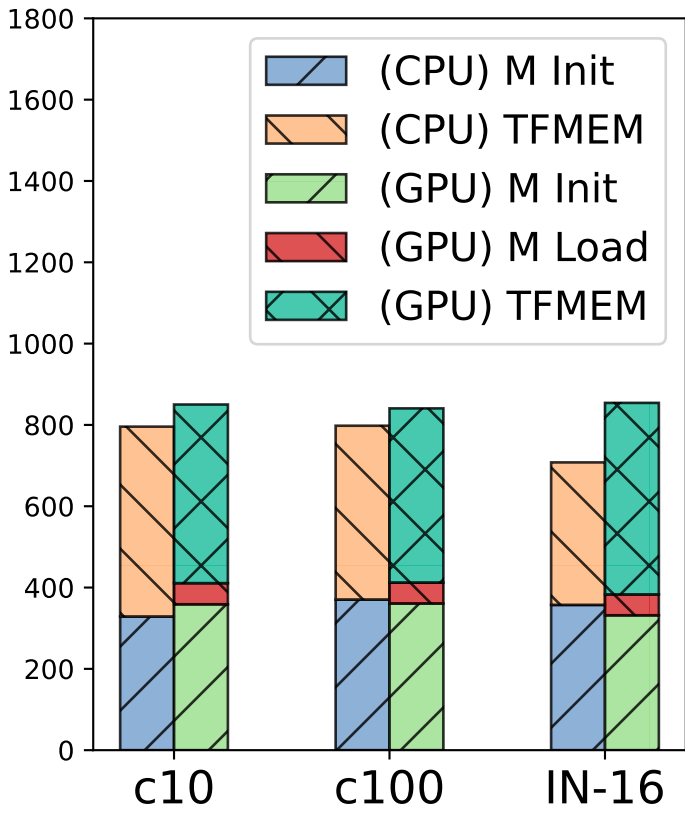

Supplement: supplementary_material [file attachment]

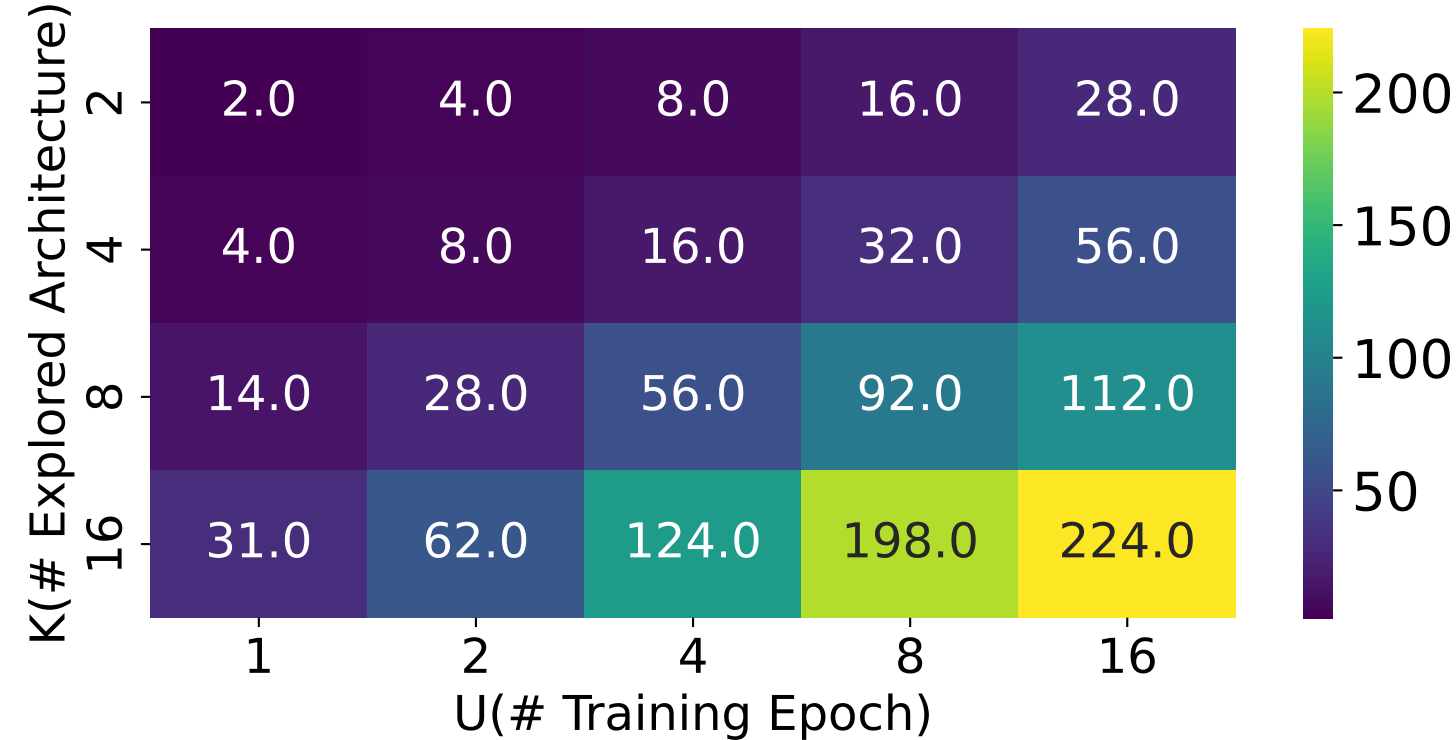

Supplement: supplementary_material [file attachment]

AUC on CRITEO

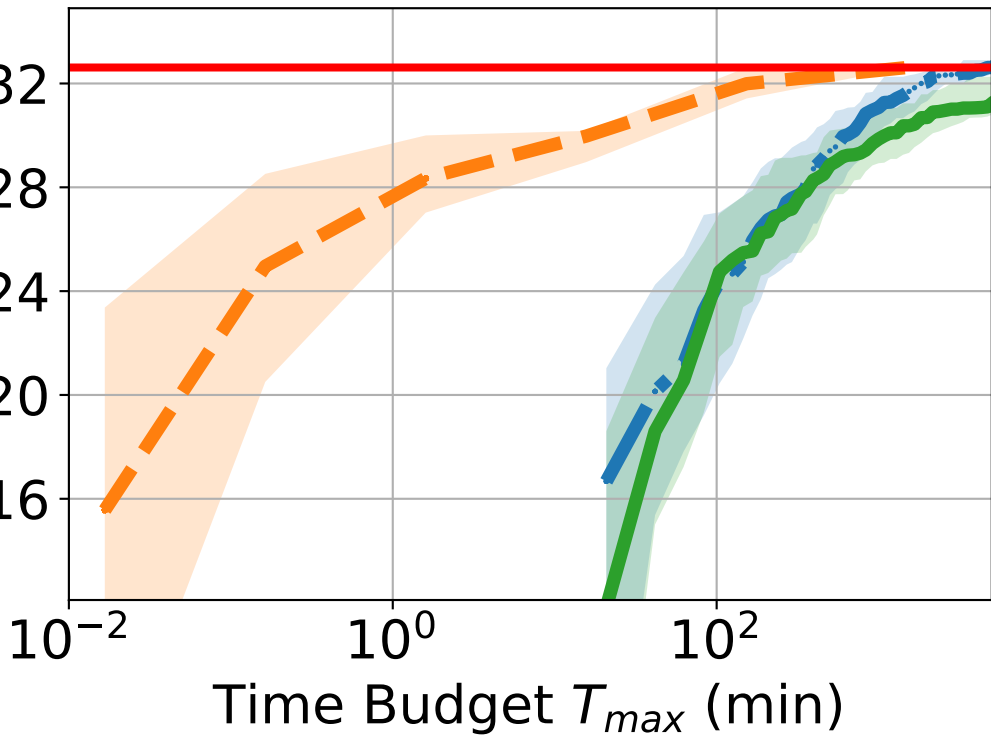

Supplement: supplementary_material [file attachment]

AUC on FRAPPE

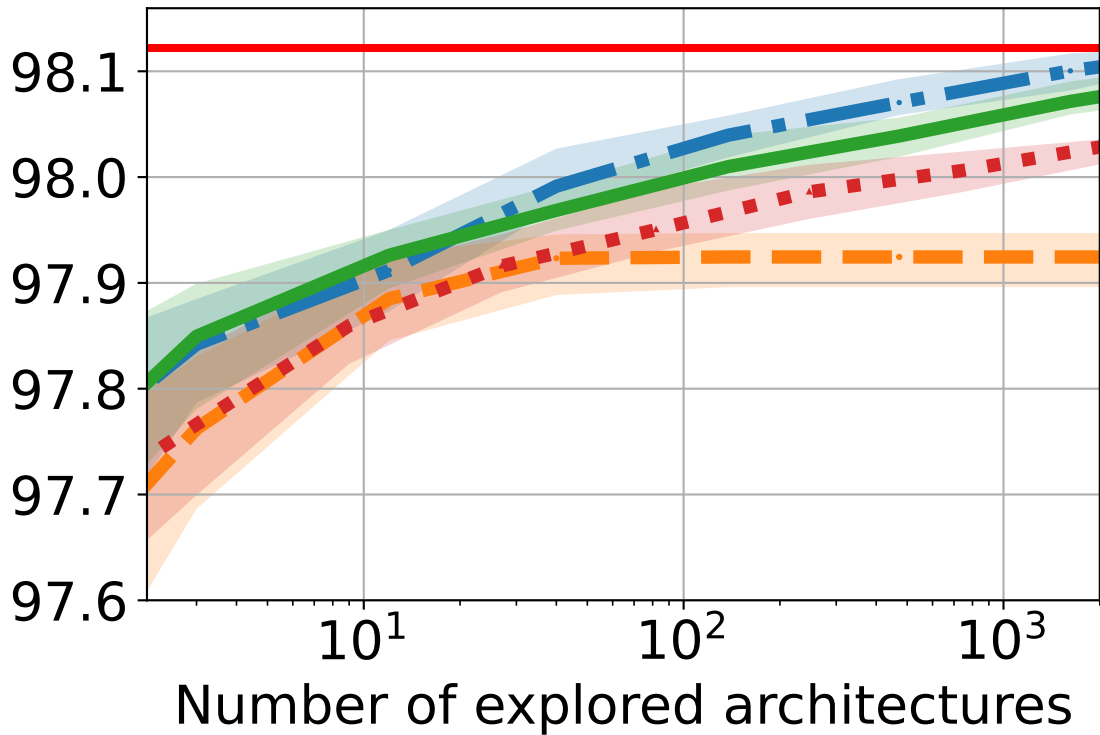

Supplement: supplementary_material [file attachment]

AUC on FRAPPE

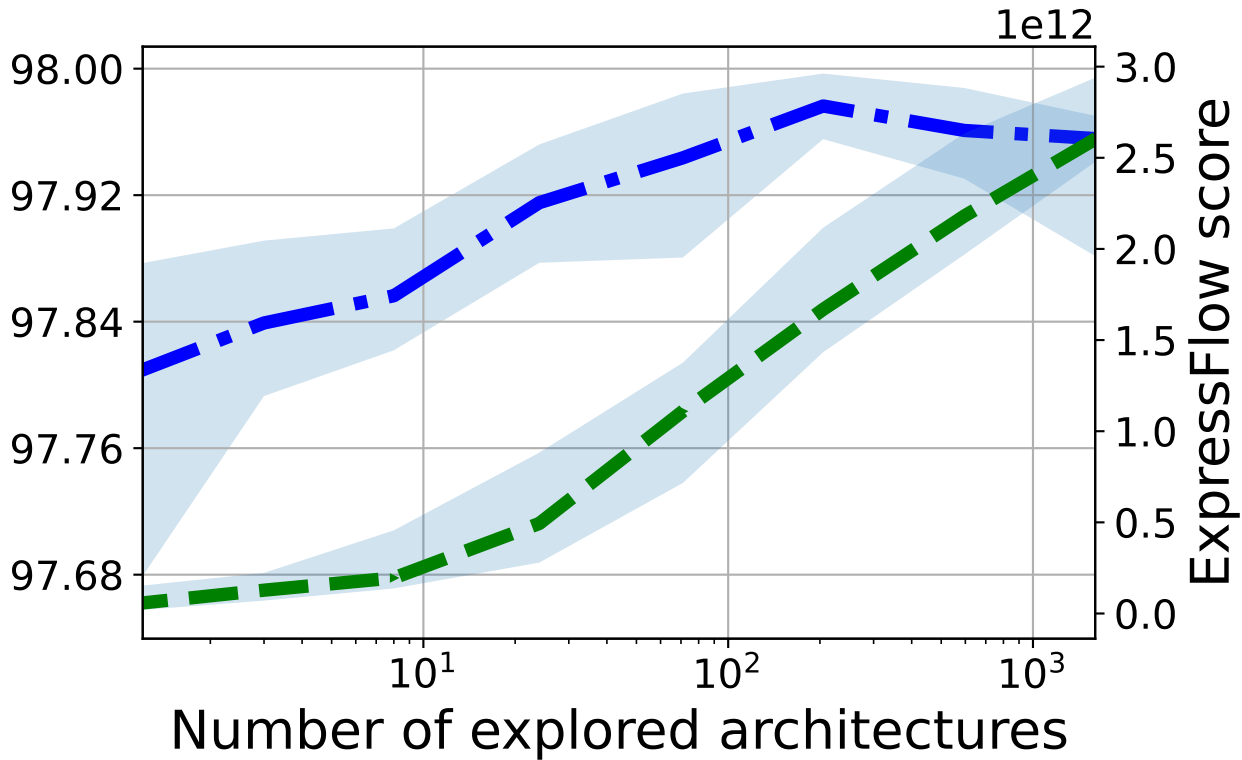

Supplement: supplementary_material [file attachment]

AUC on DIABETES

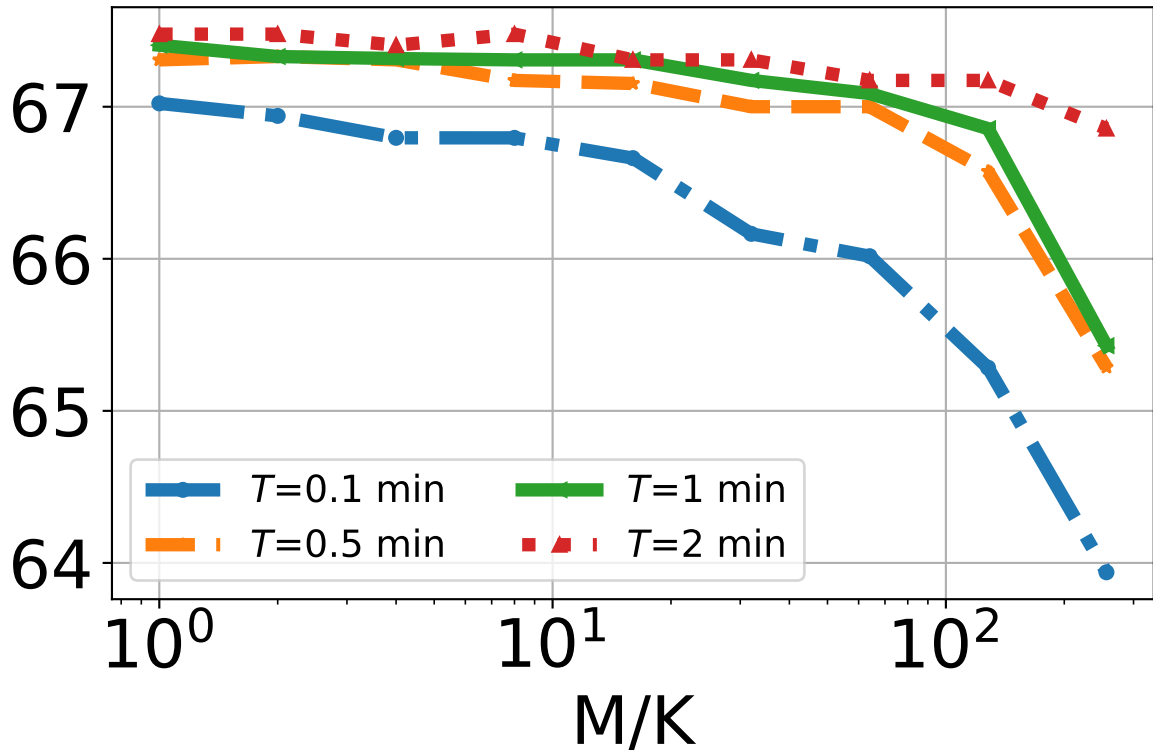

Supplement: supplementary_material [file attachment]

Noisy Degree

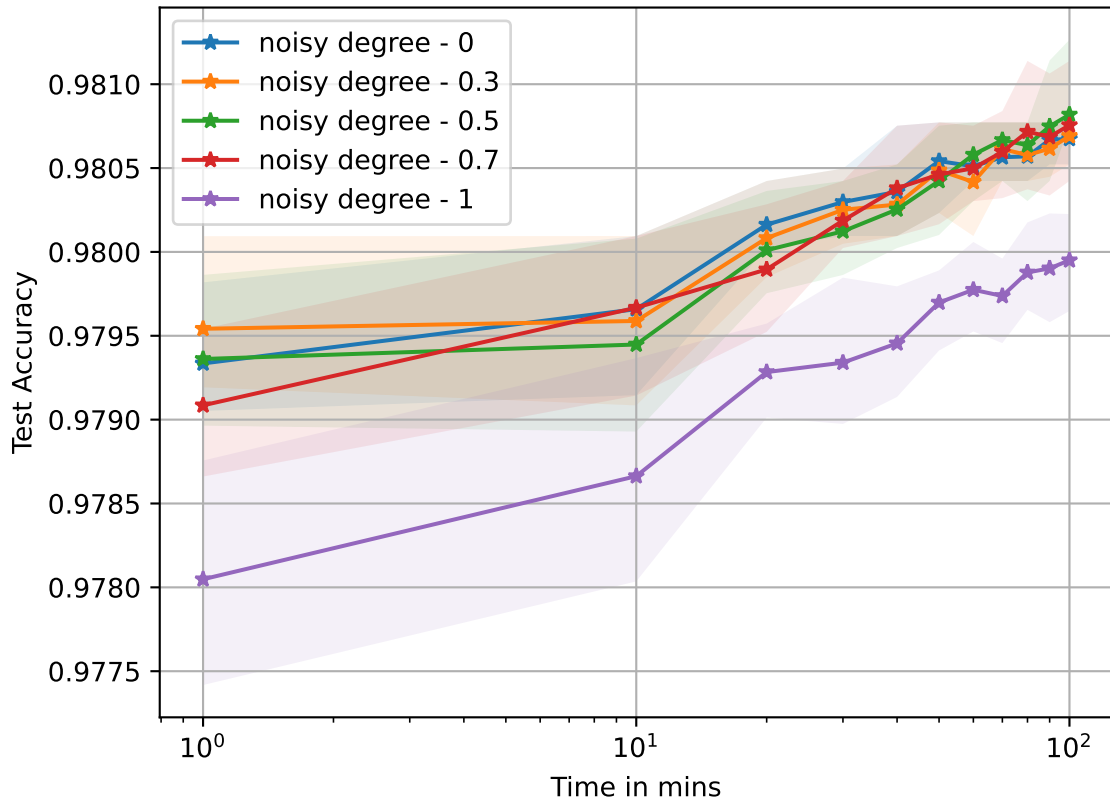

Supplement: supplementary_material [file attachment]

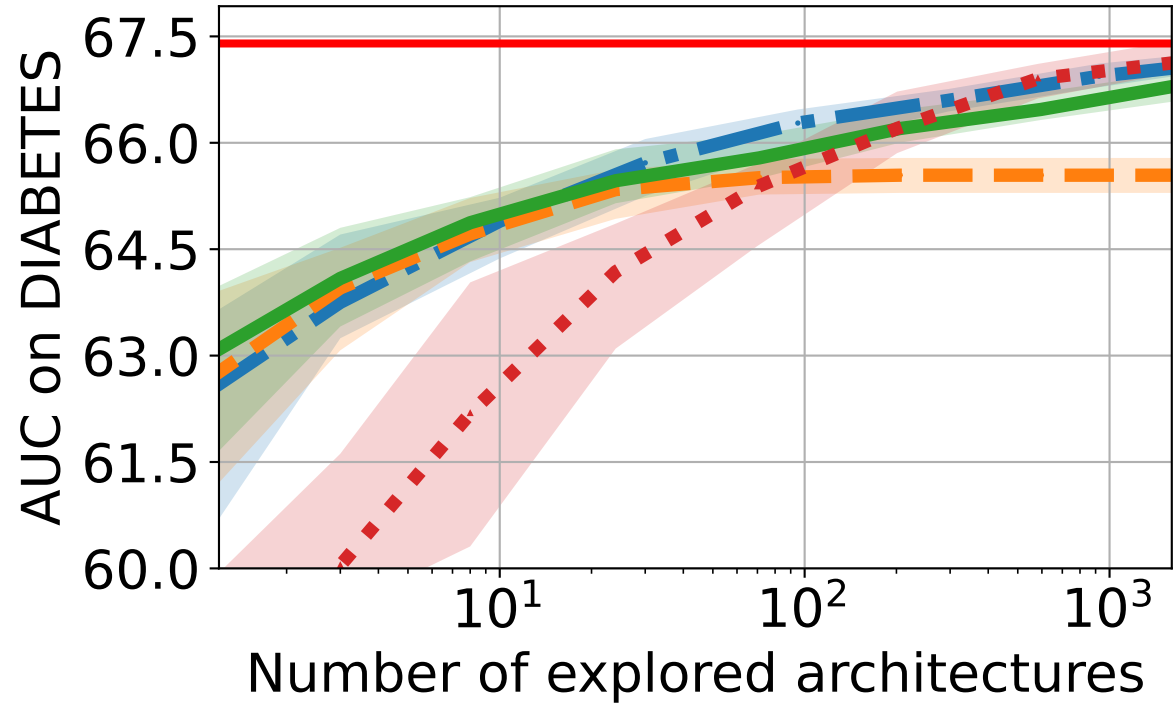

Supplement: supplementary_material [file attachment]

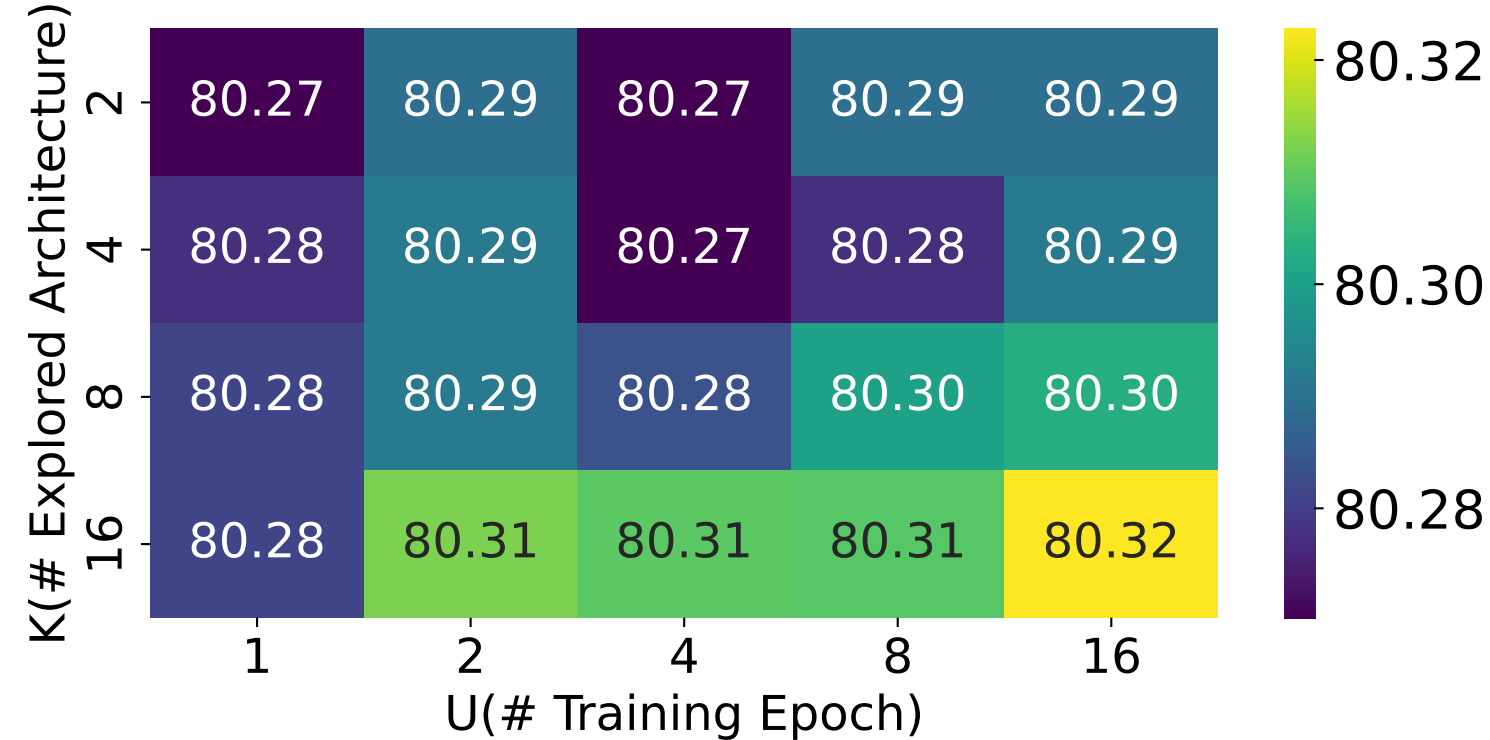

Supplement: supplementary_material [file attachment]

AUC on CRITEO

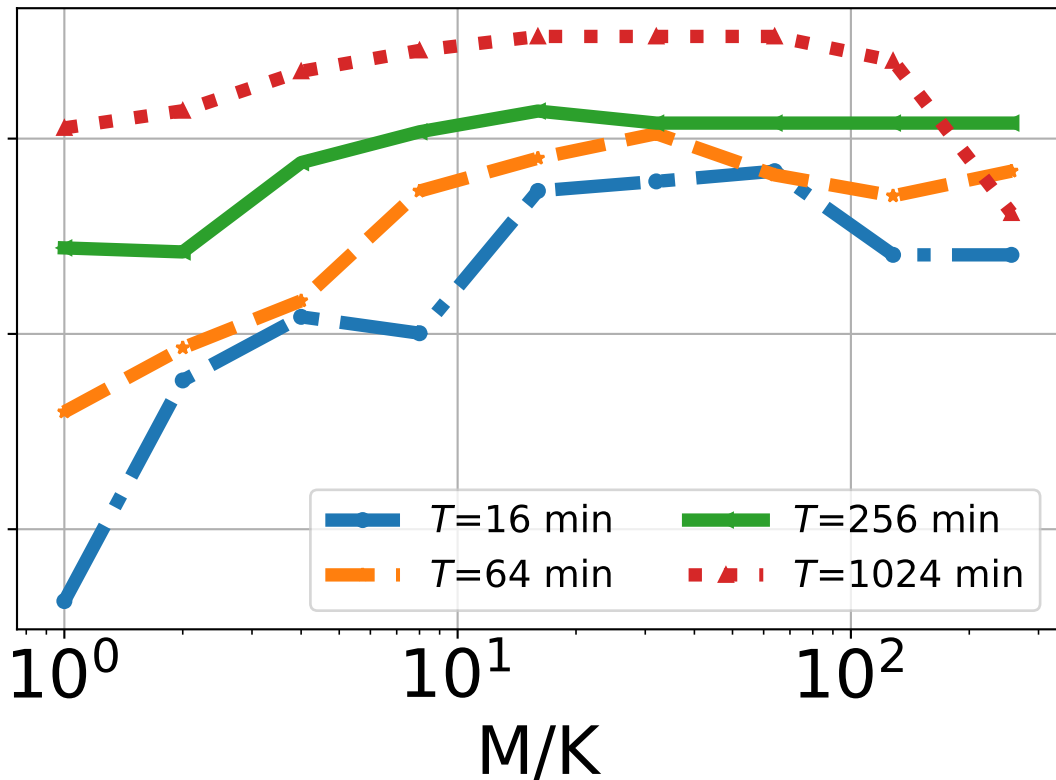

Supplement: supplementary_material [file attachment]

AUC on FRAPPE

98.0

97.9

97.8

97.7

97.6

97.5

$10^{-2}$

$10^{-1}$

$10^0$

$10^1$

$10^2$

Response Time Threshold  $T_{max}$  (min)

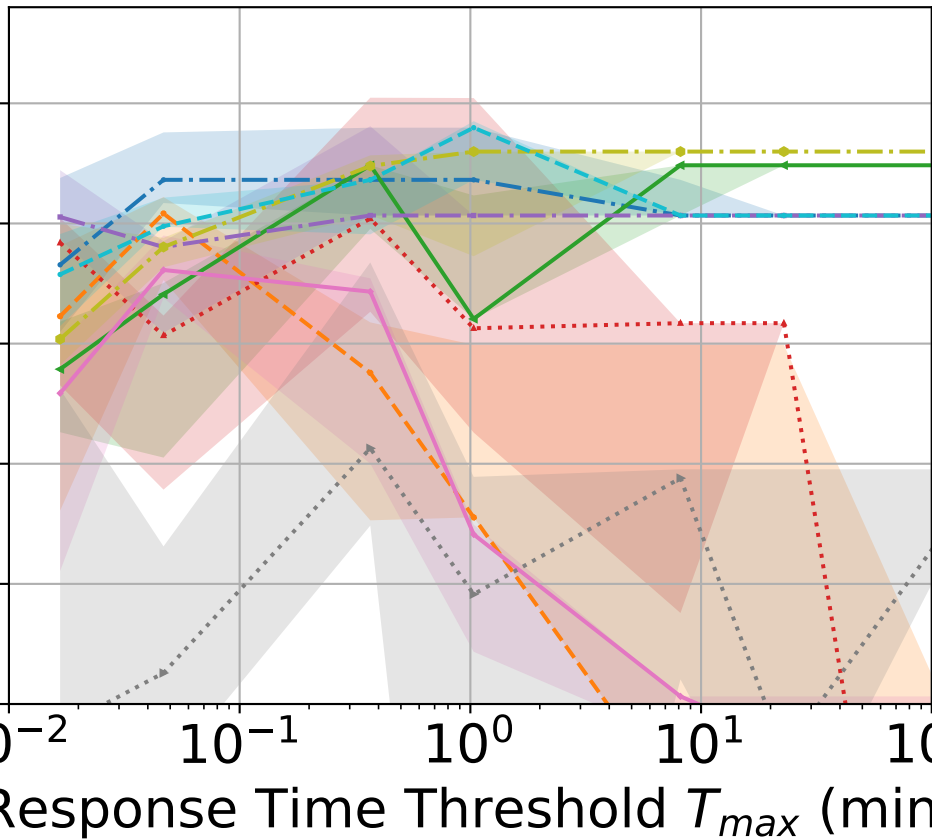

Supplement: supplementary_material [file attachment]

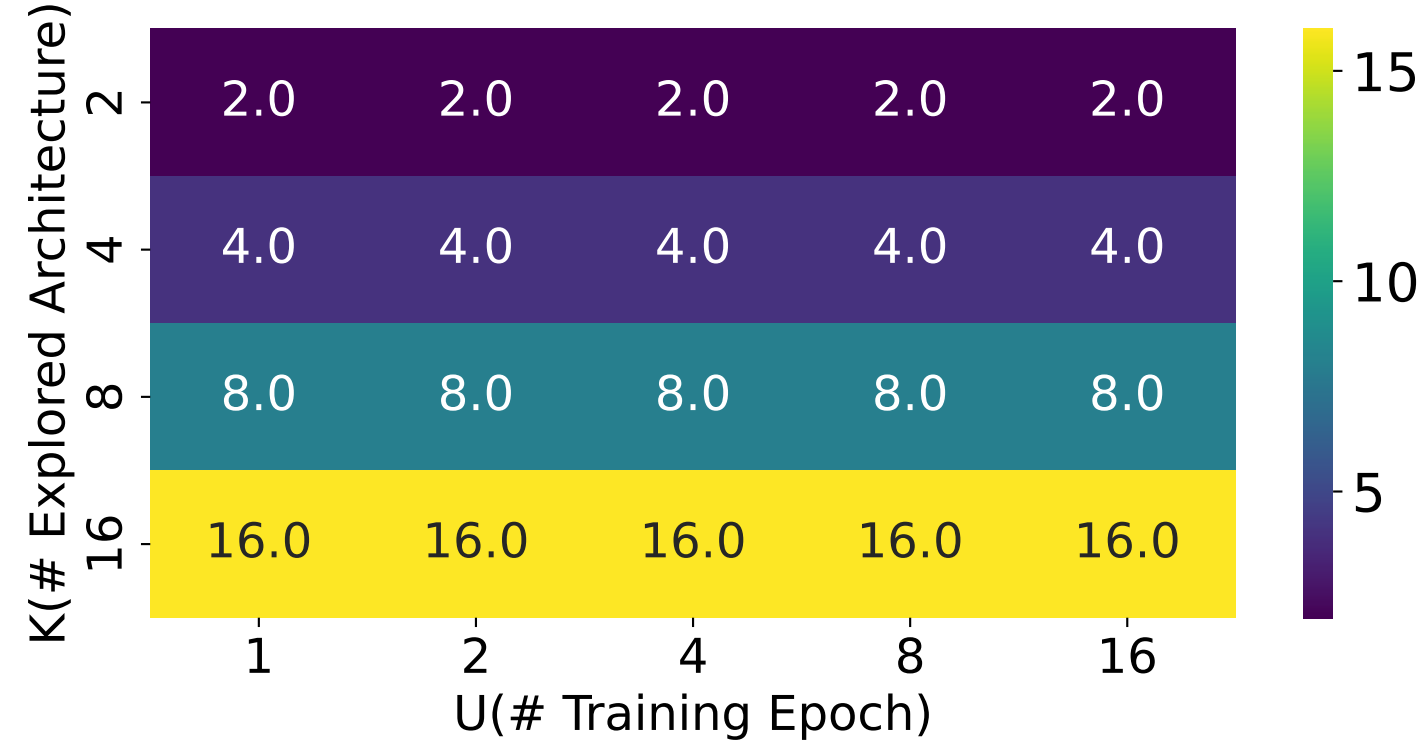

Supplement: supplementary_material [file attachment]

AUC on CRITEO

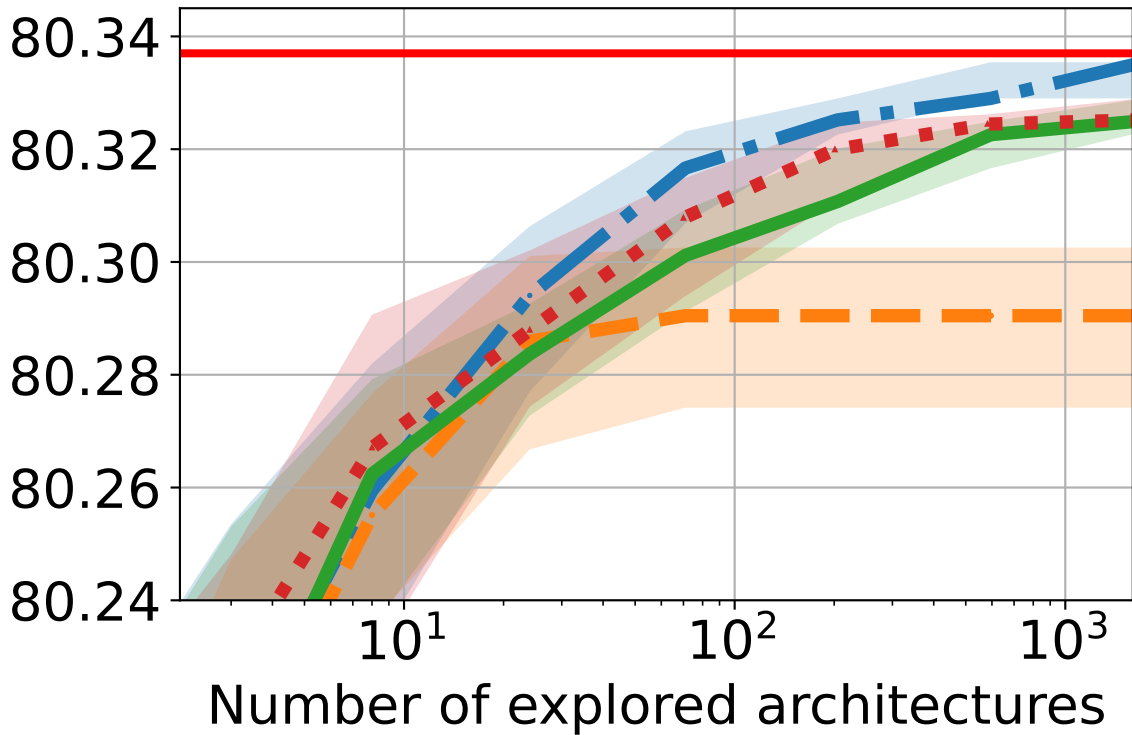

Supplement: supplementary_material [file attachment]

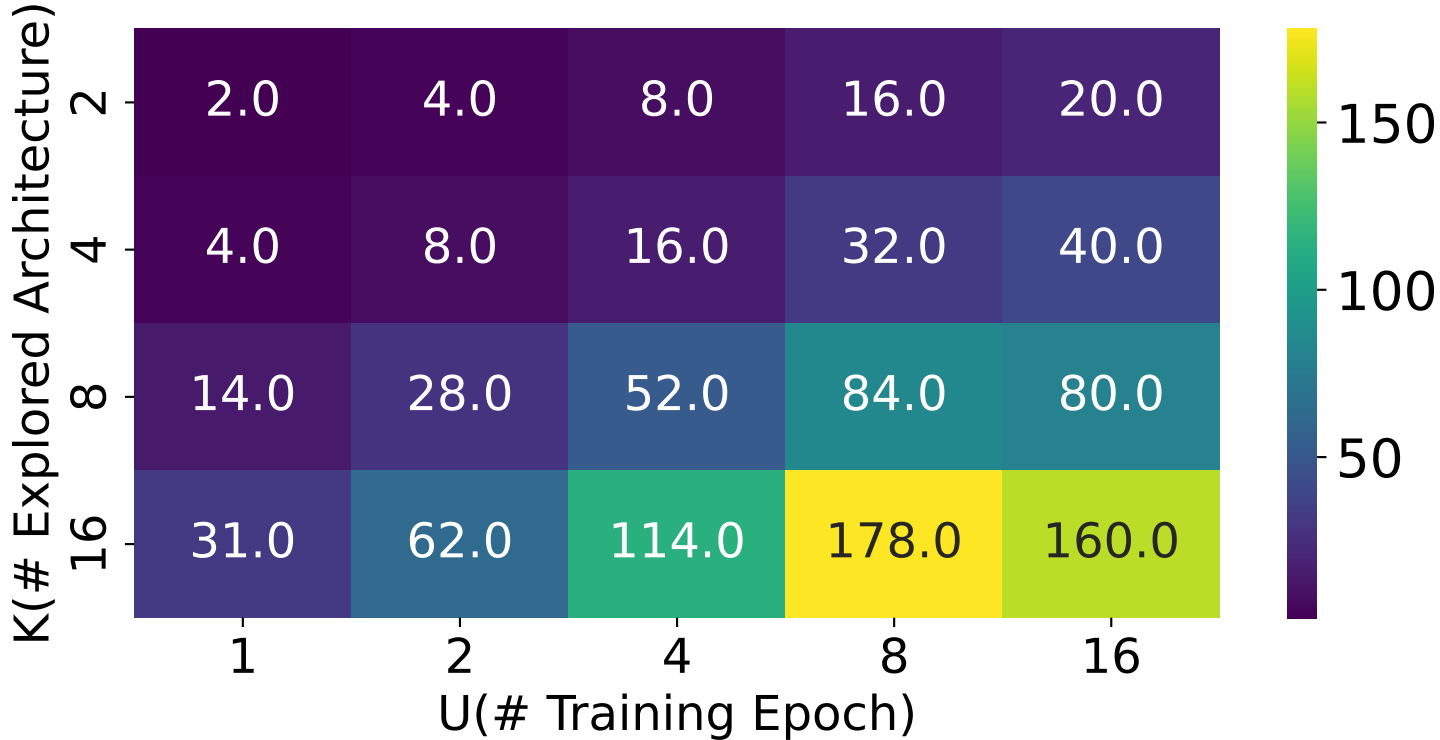

Supplement: supplementary_material [file attachment]

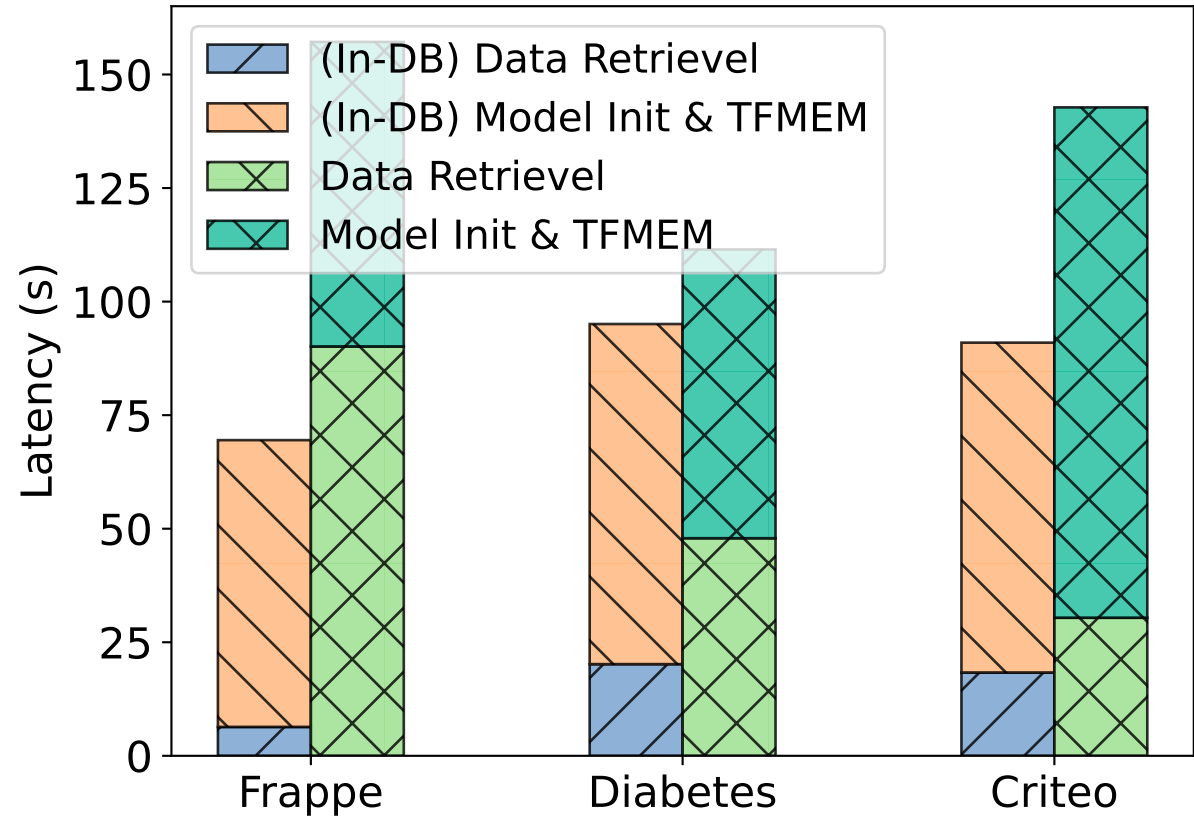

Supplement: supplementary_material [file attachment]

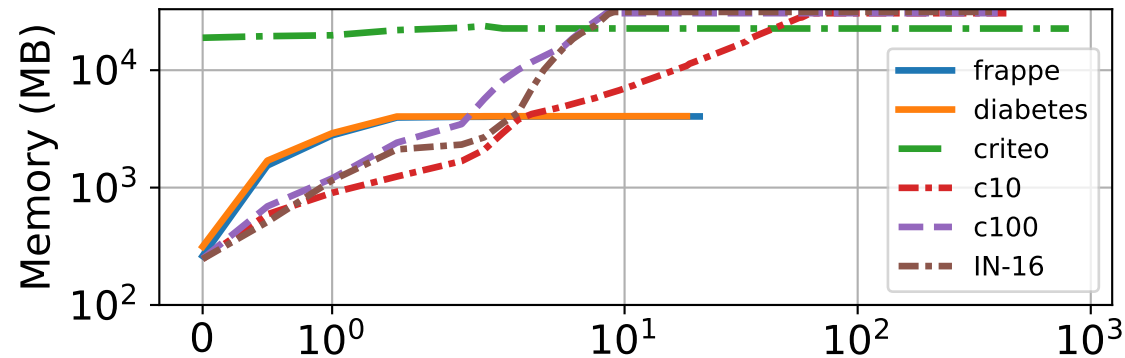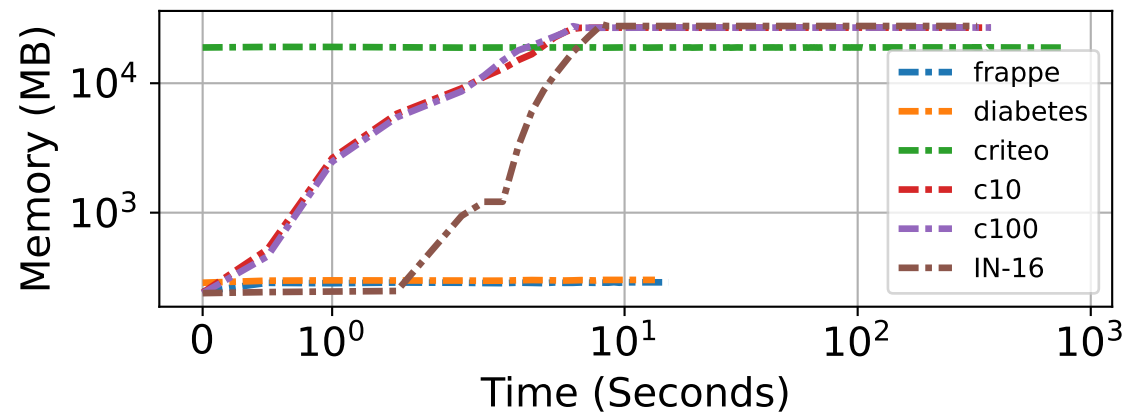

Supplement: supplementary_material [file attachment]

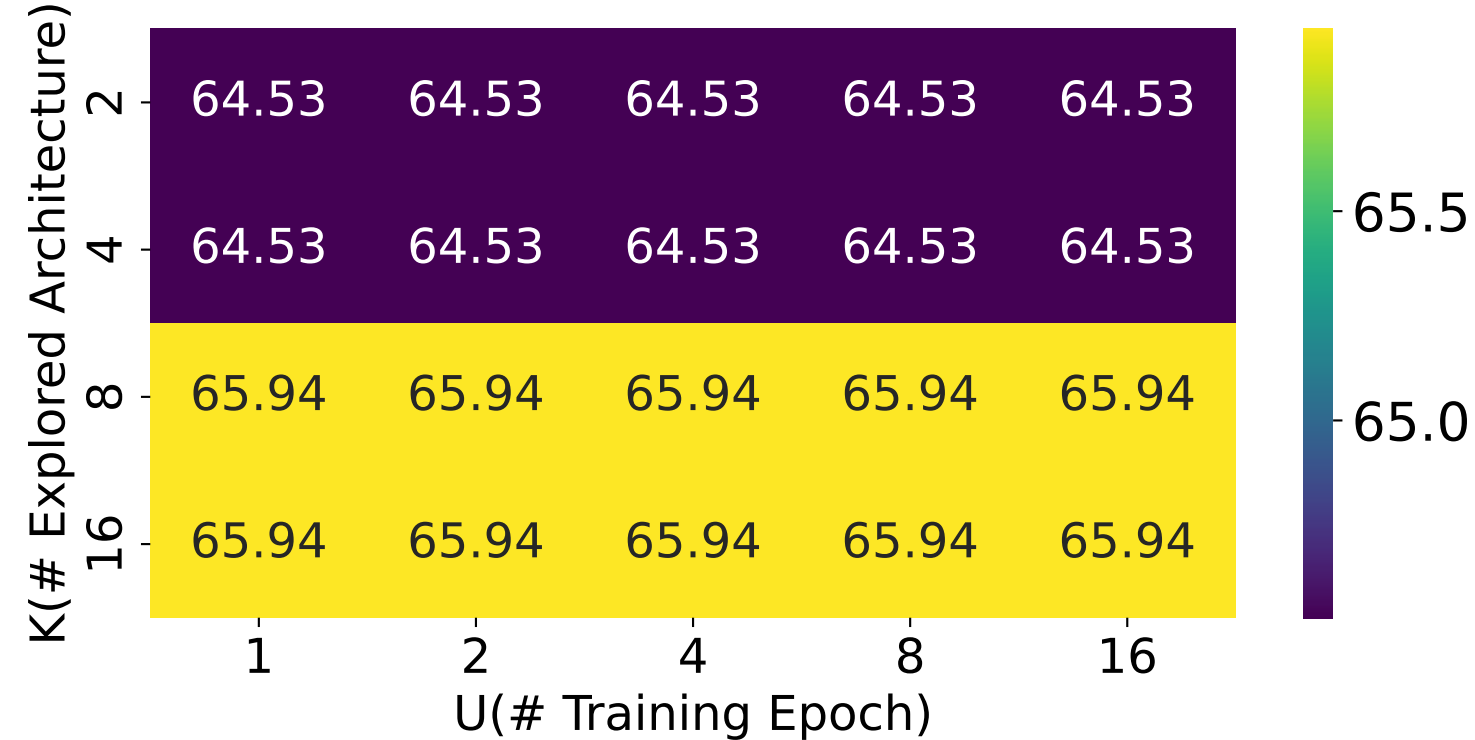

Supplement: supplementary_material [file attachment]

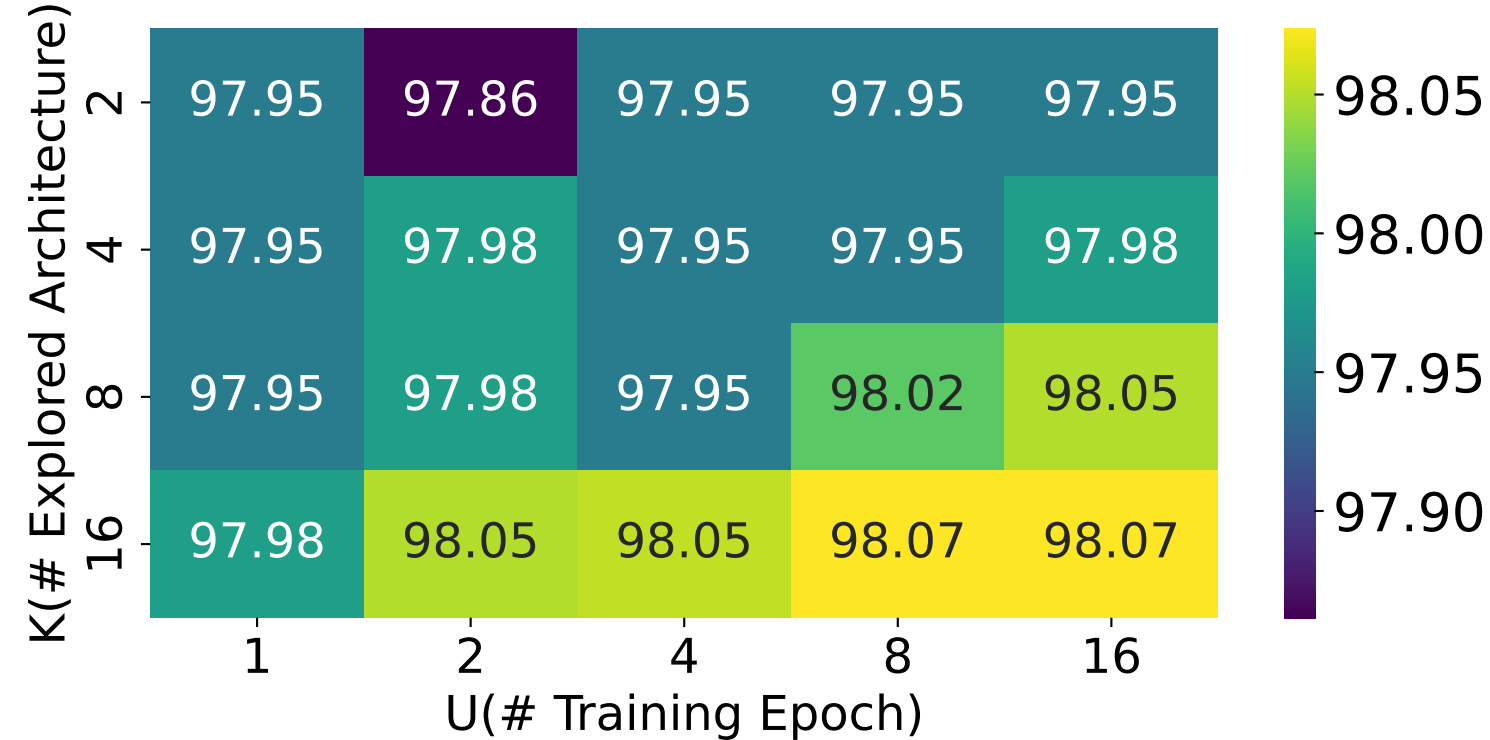

Supplement: supplementary_material [file attachment]

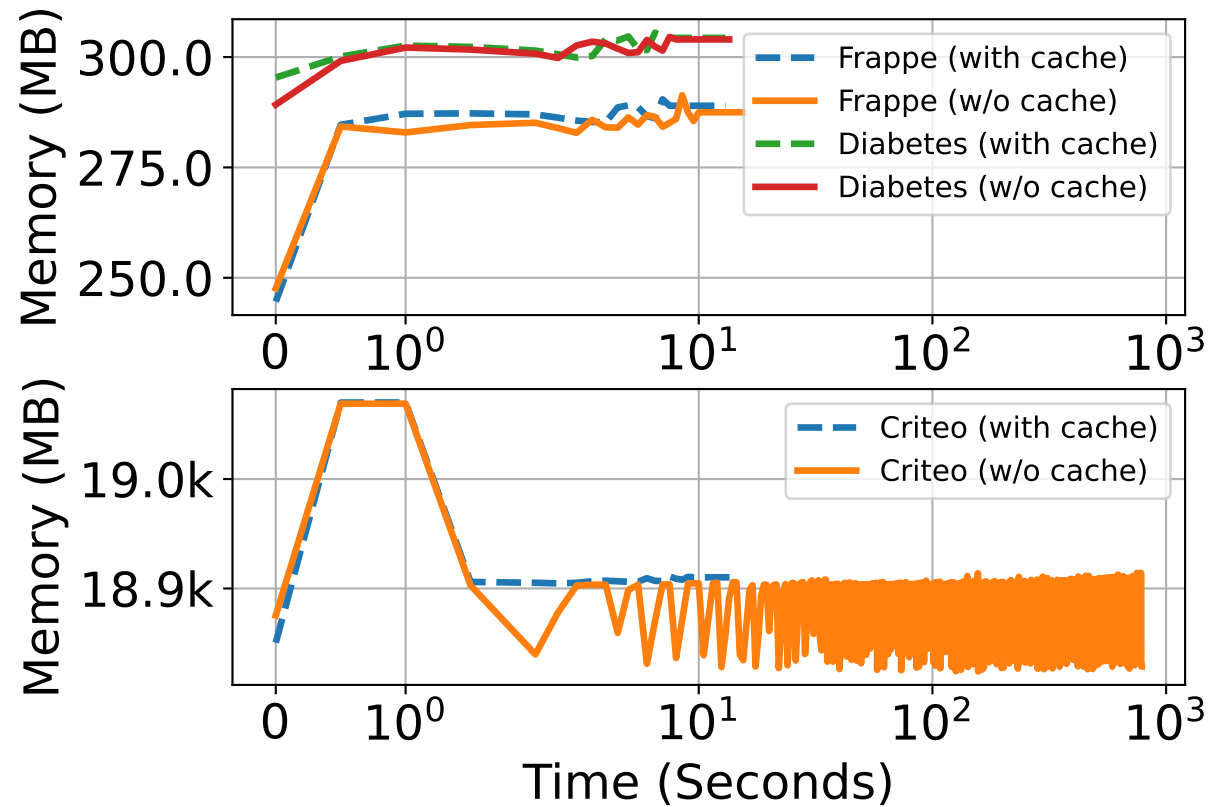

Supplement: supplementary_material [file attachment]

AUC on FRAPPE

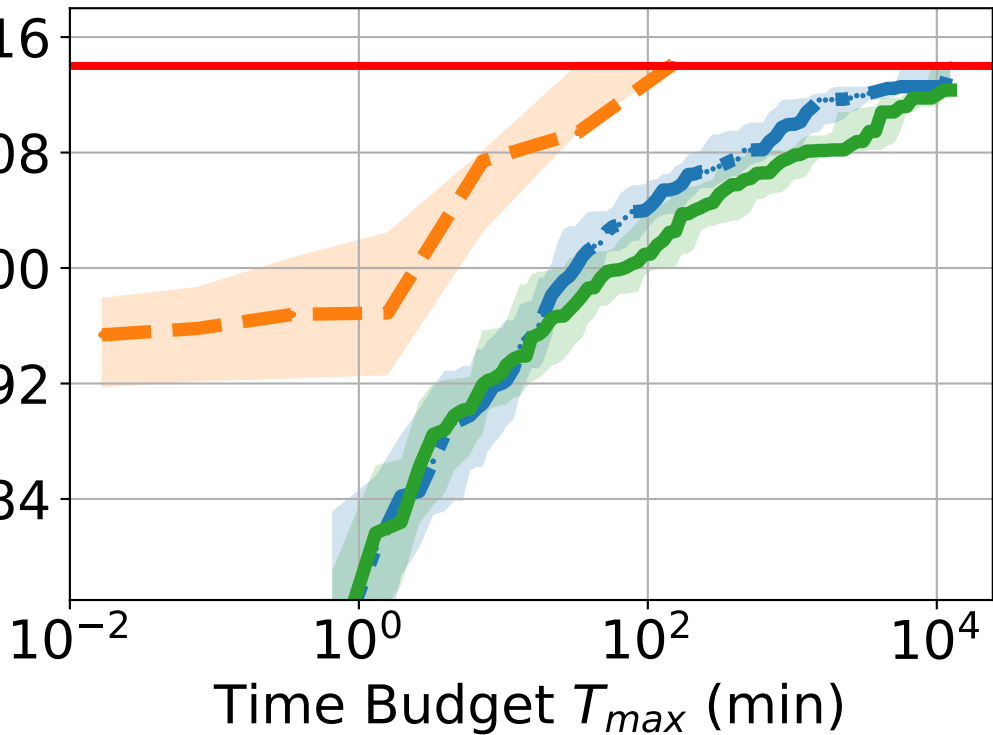

Supplement: supplementary_material [file attachment]

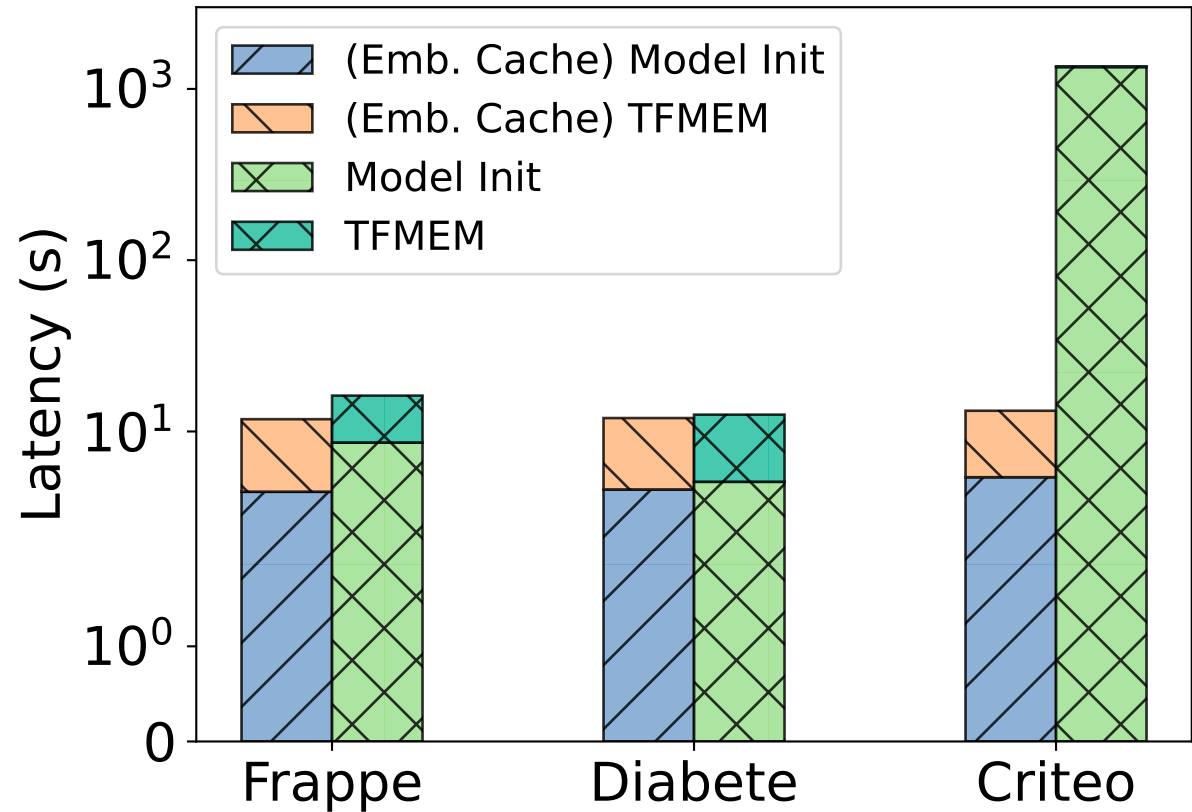

Supplement: supplementary_material [file attachment]

# Latency by Number of Workers

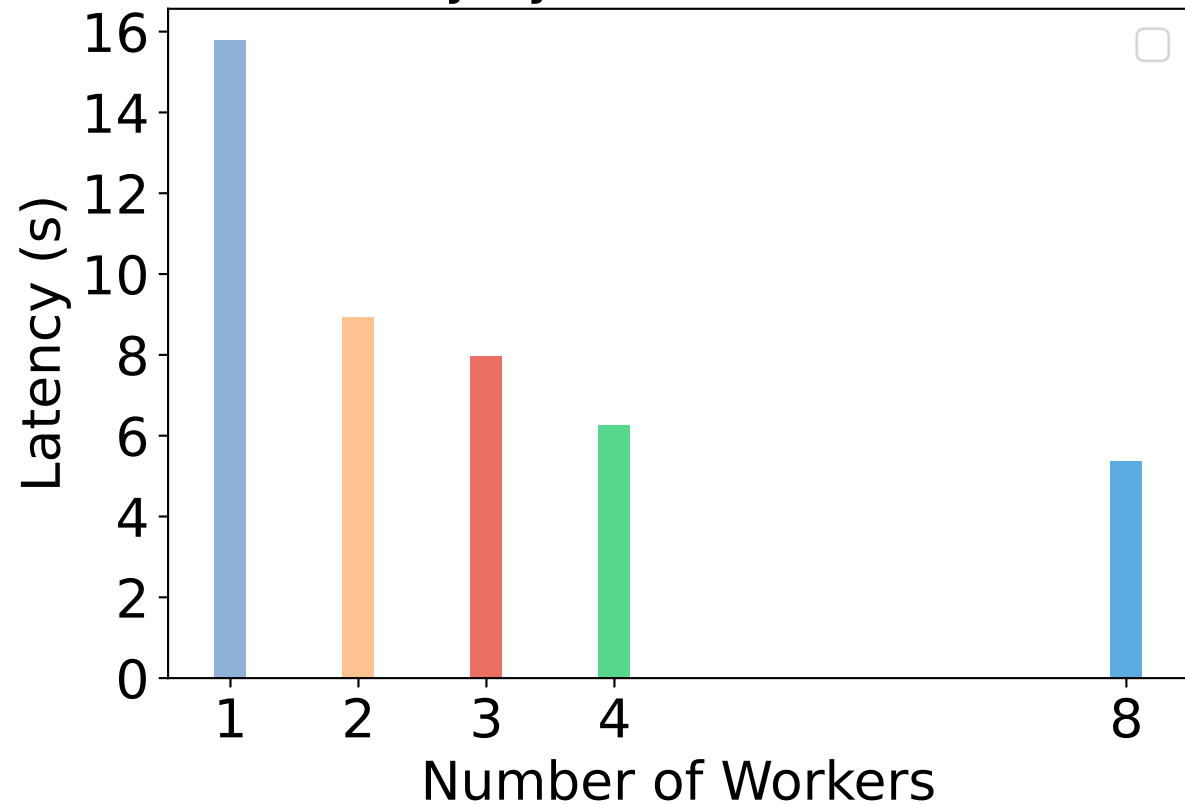

Supplement: supplementary_material [file attachment]

AUC on DIABETES

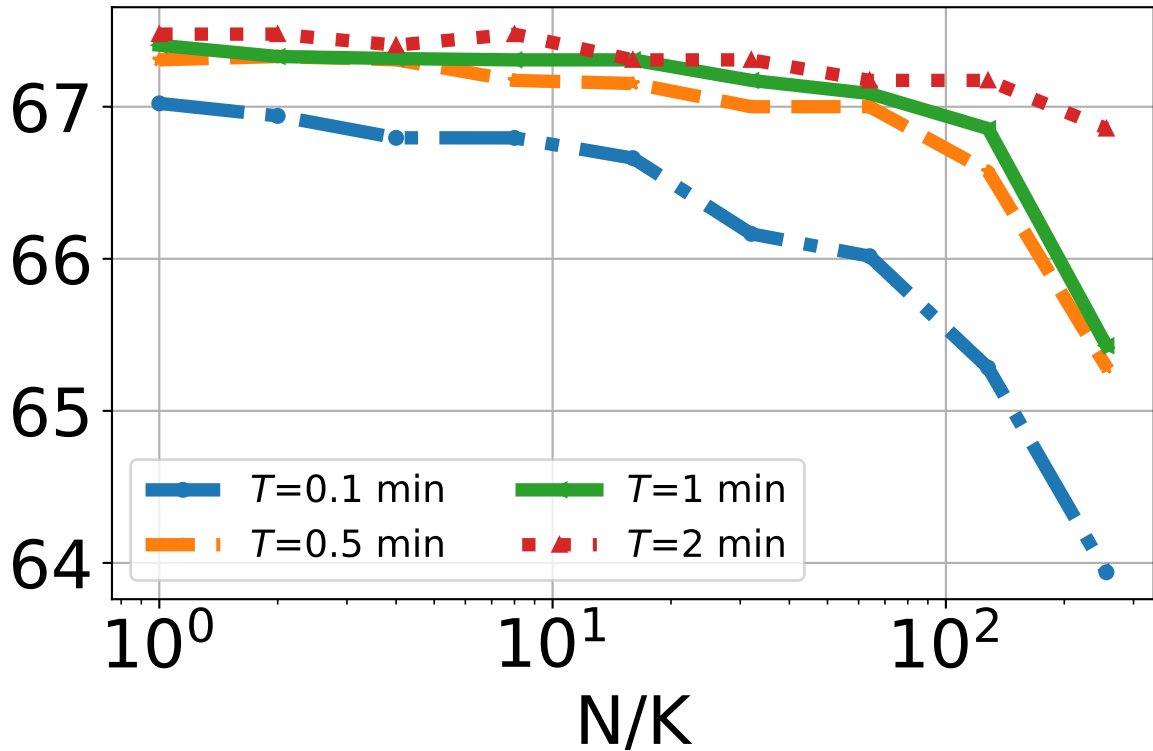

Supplement: supplementary_material [file attachment]

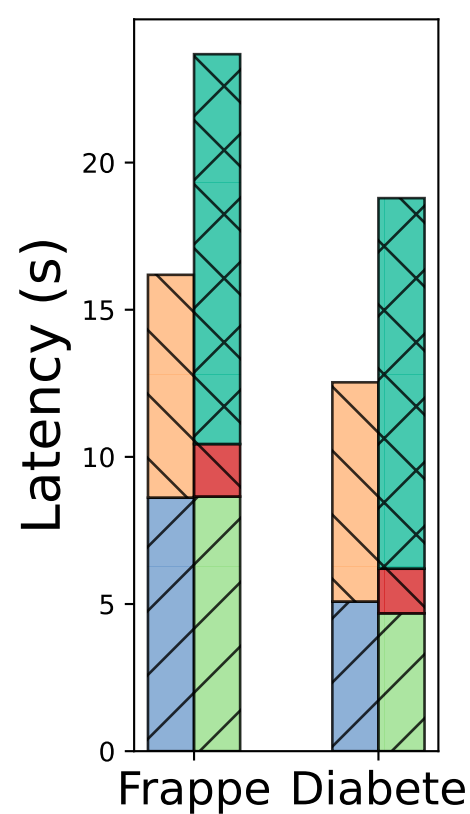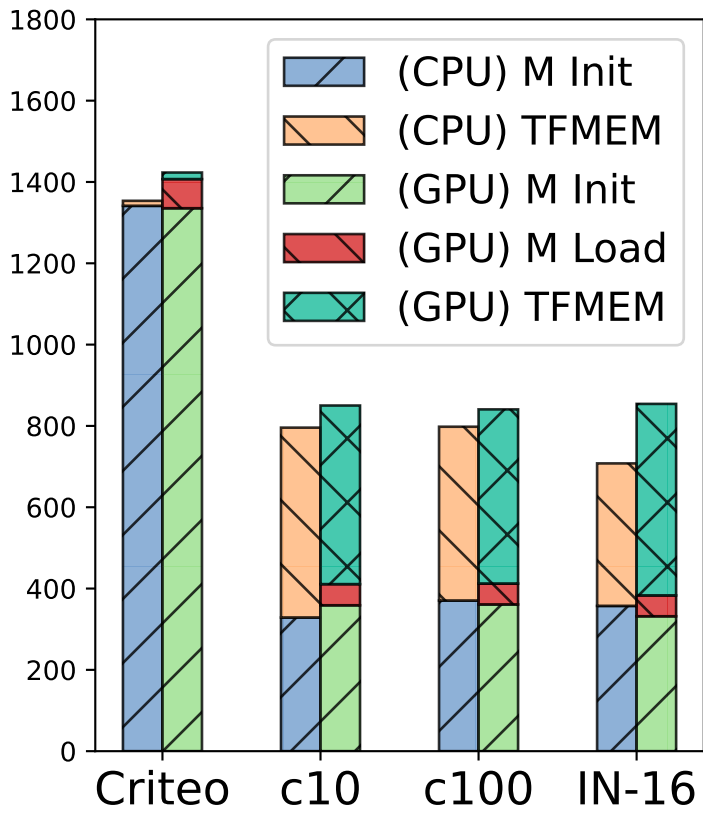

Supplement: supplementary_material [file attachment]

# Memory Usage by Number of Workers

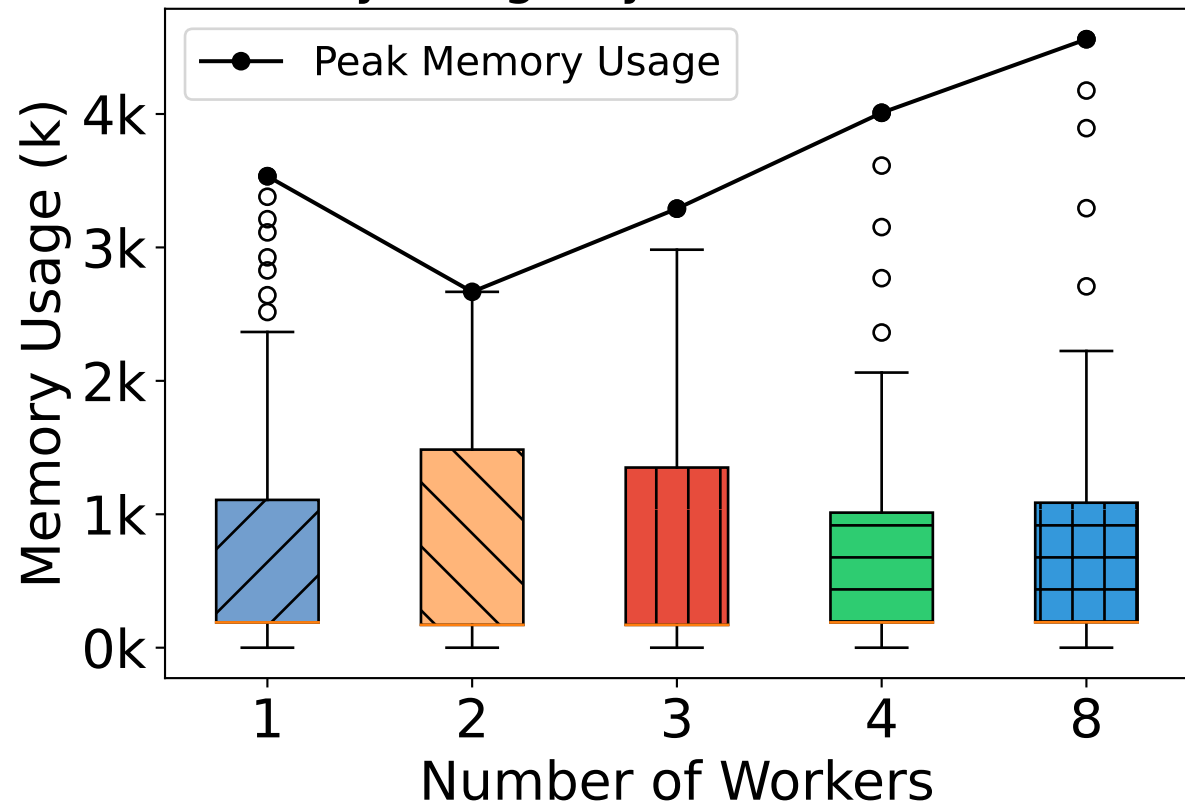

Supplement: supplementary_material [file attachment]
